# Supplementary figures and images for: Direct fabrication of high-quality vertical graphene nanowalls on arbitrary substrates without catalysts for tidal power generation
Source: Royal Society of Chemistry journal article supplement (doi:10.1039/d2nr03489a), 2022-01-01

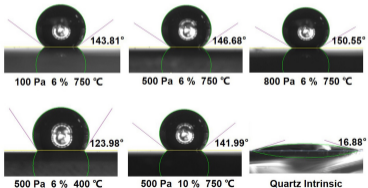

Supplement: d2nr03489a10.pdf [file d2nr03489a10.pdf]

**(a) Low pressure**

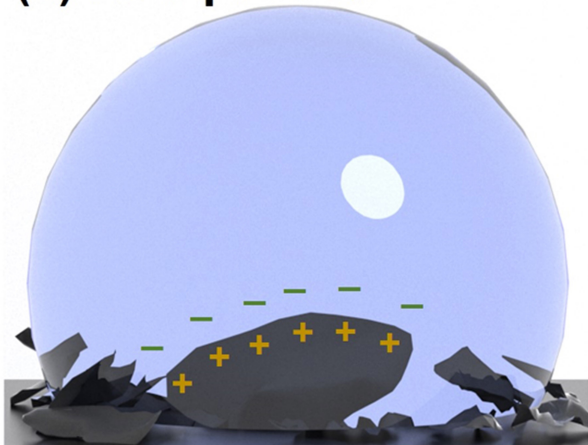

100 Pa

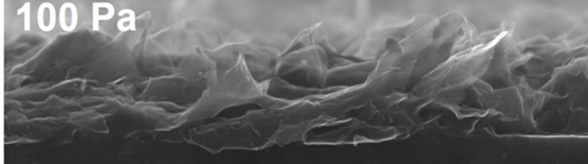

**(b) High pressure**

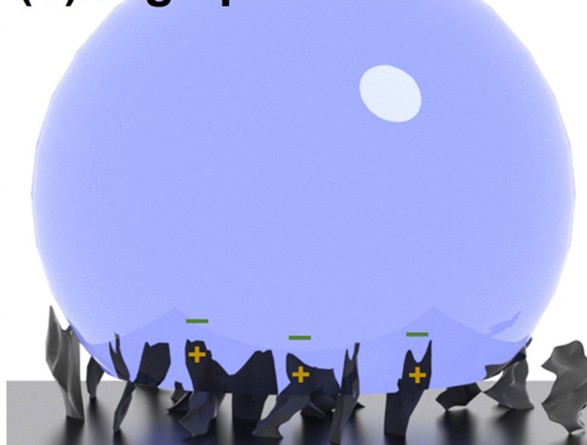

800 Pa

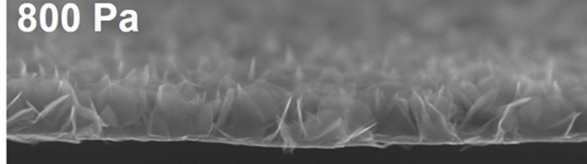

**(c)**

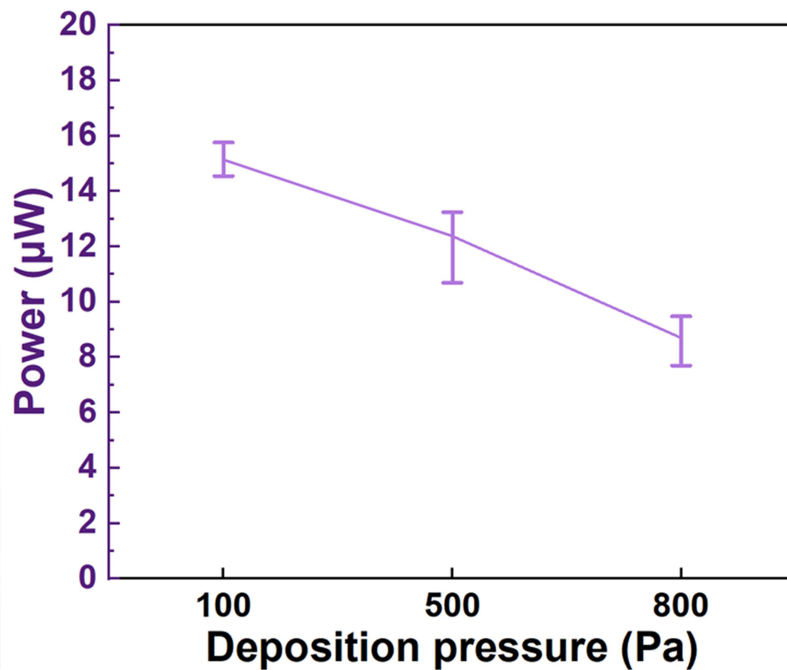

Supplement: d2nr03489a11.pdf [file d2nr03489a11.pdf]

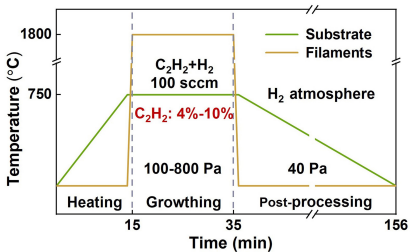

Supplement: d2nr03489a2.pdf [file d2nr03489a2.pdf]

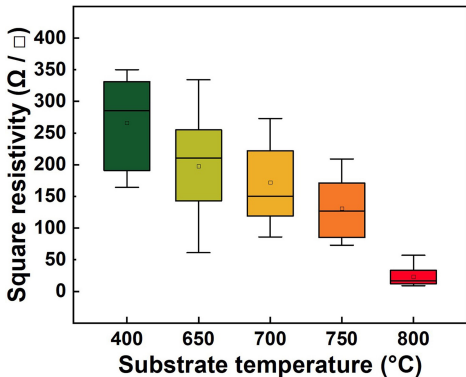

Supplement: d2nr03489a3.pdf [file d2nr03489a3.pdf]

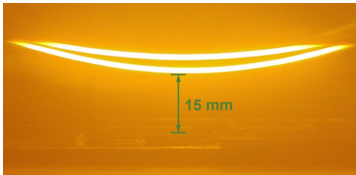

Supplement: d2nr03489a4.pdf [file d2nr03489a4.pdf]

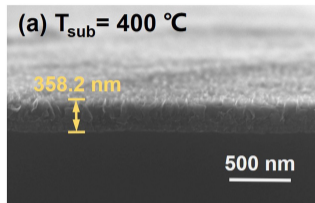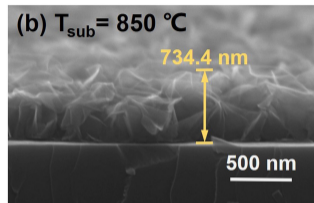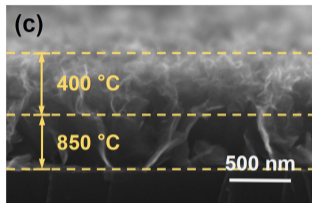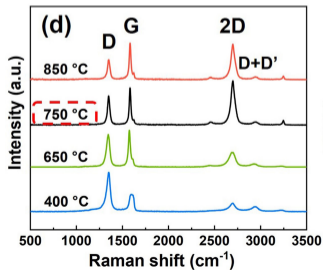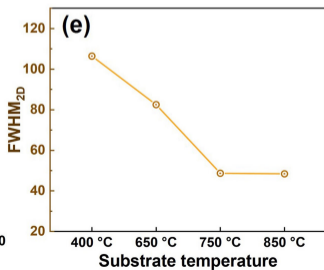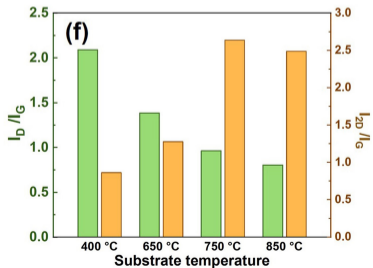

Supplement: d2nr03489a5.pdf [file d2nr03489a5.pdf]

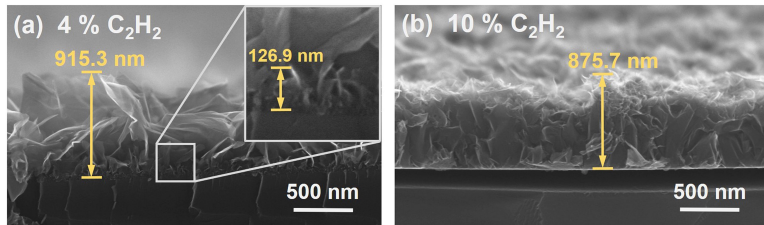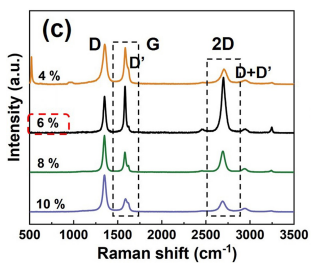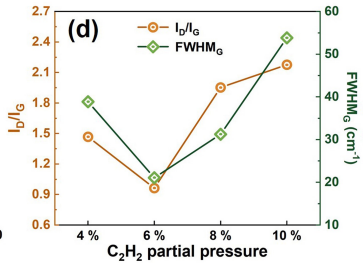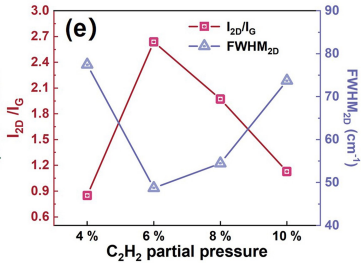

Supplement: d2nr03489a6.pdf [file d2nr03489a6.pdf]

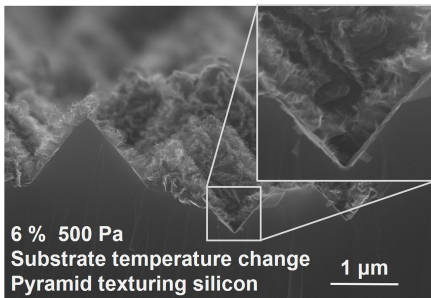

Supplement: d2nr03489a7.pdf [file d2nr03489a7.pdf]

(a) 100 Pa 750 °C

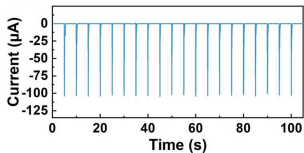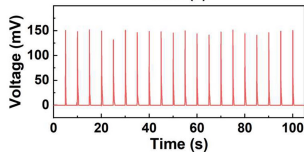

(b) 800 Pa 750 °C

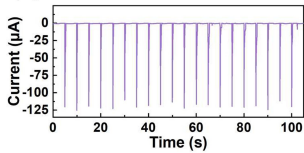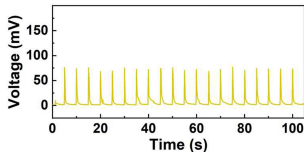

(c) 500 Pa 400 °C

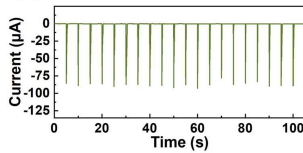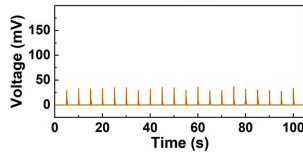

Supplement: d2nr03489a8.pdf [file d2nr03489a8.pdf]

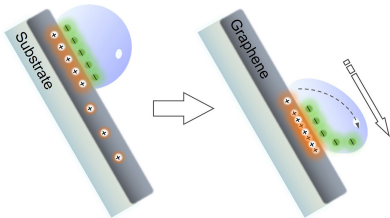

Supplement: d2nr03489a9.pdf [file d2nr03489a9.pdf]
